# Supplementary material for: SKAP2 is required for defense against K. pneumoniae infection and neutrophil respiratory burst
Source: eLife journal article supplement (doi:10.7554/elife.56656), 2020-04-30
Supplement: supp [file Supplementary file 1-source data.xlsx]

## Sheet: Experiment 1
		BALB/c			SKAP2KO			10'						BALB/c			SKAP2KO			10'
		Uns	Kp 10	Kp 15	Uns	Kp 10	Kp 15	WT - IgG	KO - IgG					Uns	Kp 10	Kp 15	Uns	Kp 10	Kp 15	WT - IgG	KO - IgG
	pSyk	356	877	1000	363	396	513	2260	1670				pVav	121	151	326	98.4	139	181	747	256
	Total	7530	6830	10900	9940	5500	8900	8570	6850				Total	2590	2580	2780	2750	2460	3240	2440	2000
Normalized to RhoGDI	RhoGDI	865	798	920	809	769	862	872	845			Normalized to RhoGDI	RhoGDI	4730	1590	1490	1330	1170	1380	1960	2570
	phospho/total	0.0472776	0.128404	0.0917431	0.0365191	0.072	0.0576404	0.263711	0.243796				phospho/total	0.0467181	0.0585271	0.117266	0.0357818	0.0565041	0.0558642	0.306148	0.128
	Syk/RhoGDI	5.46561e-05	0.000160907	9.97208e-05	4.51411e-05	9.36281e-05	6.68683e-05	0.00030242	0.000288516				Vav/RhoGDI	9.87699e-06	3.68095e-05	7.87021e-05	2.69036e-05	4.82941e-05	4.04813e-05	0.000156198	4.98054e-05
	fold change to uns	1	2.944	1.82451	1	2.07412	1.48132	5.53315	6.39142				fold change to uns	1	3.7268	7.96823	1	1.79508	1.50468	15.8143	1.85125
	phospho/RhoGDI	0.411561	1.099	1.08696	0.448702	0.514954	0.595128	2.59174	1.97633				phospho/RhoGDI	0.0255814	0.0949686	0.218792	0.073985	0.118803	0.131159	0.381122	0.0996109
	total/RhoGDI	8.7052	8.5589	11.8478	12.2868	7.15215	10.3248	9.82798	8.10651				total/RhoGDI	0.547569	1.62264	1.86577	2.06767	2.10256	2.34783	1.2449	0.77821
	phospho (fold change to uns)	1	2.67032	2.64106	1	1.14765	1.32633	6.29735	4.40455				pVav	1	3.71241	8.55278	1	1.60578	1.77278	14.8984	1.34637
	total (fold change to uns)	1	0.983193	1.36101	1.41143	0.835639	0.871453	1.12898	0.659775				total Vav	1	2.96336	3.40737	1	1.01688	1.13549	2.2735	0.376371
	phospho/total	0.0472776	0.128404	0.0917431	0.0365191	0.072	0.0576404	0.263711	0.243796				phospho/total	0.0467181	0.0585271	0.117266	0.0357818	0.0565041	0.0558642	0.306148	0.128
	phospho/total (fold change)	1	2.71596	1.94052	1	1.97157	1.57836	5.57792	6.67584				phospho/total (fold change)	1	1.25277	2.51008	1	1.57913	1.56125	6.55308	3.57724
		BALB/c			SKAP2KO			10'						BALB/c			SKAP2KO			10'
		Uns	Kp 10	Kp 15	Uns	Kp 10	Kp 15	WT - IgG	KO - IgG					Uns	Kp 10	Kp 15	Uns	Kp 10	Kp 15	WT - IgG	KO - IgG
	pERK	62.7	1480	713	114	385	245	3720	2370				pAkt	31.6	87.8	142	35.9	64.7	100	1330	1040
	Total	16800	13000	15000	13800	10200	13000	13800	7550				Total	1340	961	2080	1720	2030	2930	1860	1120
Normalized to RhoGDI	RhoGDI	865	798	920	809	769	862	872	845			Normalized to RhoGDI	RhoGDI	4730	1590	1490	1330	1170	1380	1960	2570
	phospho/total	0.00373214	0.113846	0.0475333	0.00826087	0.0377451	0.0188462	0.269565	0.313907				phospho/total	0.0235821	0.0913632	0.0682692	0.0208721	0.0318719	0.0341297	0.715054	0.928571
	ERK/RhoGDI	4.31462e-06	0.000142664	5.16667e-05	1.02112e-05	4.90834e-05	2.18633e-05	0.000309134	0.000371488				Akt/RhoGDI	4.98564e-06	5.74611e-05	4.58183e-05	1.56933e-05	2.7241e-05	2.47317e-05	0.000364823	0.000361312
	fold change to uns	1	13.9713	11.9748	1	4.80681	2.14111	71.6482	36.3804				fold change to uns	1	11.5253	9.19004	1	1.73583	1.57594	73.1748	23.0233
	phospho/RhoGDI	0.0724855	1.85464	0.775	0.140915	0.50065	0.284223	4.26606	2.80473				phospho/RhoGDI	0.00668076	0.0552201	0.095302	0.0269925	0.0552991	0.0724638	0.678571	0.404669
	total/RhoGDI	19.422	16.2907	16.3043	17.0581	13.264	15.0812	15.8257	8.93491				total/RhoGDI	0.283298	0.604403	1.39597	1.29323	1.73504	2.12319	0.94898	0.435798
	phospho (fold change to uns)	1	25.5863	10.6918	1	3.55286	2.01698	58.8539	19.9038				phospho (fold change to uns)	1	8.26554	14.2651	1	2.04869	2.68459	101.571	14.9919
	total (fold change to uns)	1	0.838778	0.83948	0.878289	0.814204	0.924981	0.814835	0.523793				total (fold change to uns)	1	2.13345	4.92758	1	1.34163	1.64177	3.34976	0.336983
	phospho/total	0.00373214	0.113846	0.0475333	0.00826087	0.0377451	0.0188462	0.269565	0.313907				phospho/total	0.0235821	0.0913632	0.0682692	0.0208721	0.0318719	0.0341297	0.715054	0.928571
	phospho/total (fold change)	1	30.5042	12.7362	1	4.56914	2.28138	72.228	37.9993				phospho/total (fold change)	1	3.87426	2.89496	1	1.52701	1.63518	30.3219	44.4887
		BALB/c			SKAP2KO			10'						BALB/c			SKAP2KO			10'
		Uns	Kp 10	Kp 15	Uns	Kp 10	Kp 15	WT - IgG	KO - IgG					Uns	Kp 10	Kp 15	Uns	Kp 10	Kp 15	WT - IgG	KO - IgG
	pSFKs	4090	5680	12700	3440	3820	5720	11100	8590				p-p38	1400	2140	2250	3140	2750	3700	19600	14600
	Total SFKs	165	395	713	445	485	845	884	1030				Total
	RhoGDI	1250	1170	1470	1230	988	1360	1360	1390			Normalized to RhoGDI	RhoGDI	4730	1590	1490	1330	1170	1380	1960	2570
Normalized to RhoGDI	phospho/total												phospho/total	#DIV/0!	#DIV/0!	#DIV/0!	#DIV/0!	#DIV/0!	#DIV/0!	#DIV/0!	#DIV/0!
	SFKs/RhoGDI	3.272	4.8547	8.63946	2.79675	3.8664	4.20588	8.16176	6.17986				p38/rhogdi	0.295983	1.34591	1.51007	2.3609	2.35043	2.68116	10	5.68093
	fold change to uns	1	1.48371	2.64042	1	1.38246	1.50385	2.49443	2.20966				fold change to uns	1	4.54726	5.10187	1	0.995563	1.13565	33.7857	2.40626
	phospho/RhoGDI	3.272	4.8547	8.63946	2.79675	3.8664	4.20588	8.16176	6.17986				phospho/RhoGDI	0.295983	1.34591	1.51007	2.3609	2.35043	2.68116	10	5.68093
	total/RhoGDI	0.132	0.337607	0.485034	0.361789	0.490891	0.621324	0.65	0.741007				total/RhoGDI	0	0	0	0	0	0	0	0
	phospho (fold change to uns)	1	1.48371	2.64042	1	1.38246	1.50385	2.49443	2.20966				phospho (fold change to uns)	1	4.54726	5.10187	1	0.995563	1.13565	33.7857	2.40626
	total (fold change to uns)	1	2.55763	3.6745	2.74082	1.45403	1.28099	4.92424	2.04818				total (fold change to uns)
	phospho/total	24.7879	14.3797	17.8121	7.73034	7.87629	6.76923	12.5566	8.33981
	phospho/total (fold change)	1	0.580112	0.71858	1	1.01888	0.875671	0.506561	1.07884
		BALB/c			SKAP2KO			10'
		Uns	Kp 10	Kp 15	Uns	Kp 10	Kp 15	WT - IgG	KO - IgG
	pPyk2	463	964	2200	440	439	393	3450	1700
	Total	2130	1130	2730	1990	1170	1280	2280	870
Normalized to RhoGDI	RhoGDI	826	699	796	668	656	807	764	815
	phospho/total	0.217371	0.853097	0.805861	0.221106	0.375214	0.307031	1.51316	1.95402
	Pyk2/RhoGDI	0.000263161	0.00122045	0.00101239	0.000330996	0.000571972	0.00038046	0.00198057	0.00239757
	fold change to uns	1	4.63767	3.84703	1	1.72803	1.14944	7.52609	7.24351
	phospho/RhoGDI	0.560533	1.37911	2.76382	0.658683	0.669207	0.486989	4.51571	2.08589
	total/RhoGDI	2.57869	1.6166	3.42965	2.97904	1.78354	1.58612	2.98429	1.06748
	phospho (fold change to uns)	1	2.46036	4.9307	1	1.01598	0.739338	8.0561	3.16676
	total (fold change to uns)	1	0.626905	1.33	1	0.598695	0.532427	1.15729	0.358332
	phospho/total	0.217371	0.853097	0.805861	0.221106	0.375214	0.307031	1.51316	1.95402
	phospho/total (fold change)	1	3.92462	3.70731	1	1.69699	1.38862	6.96118	8.83751

## Sheet: Experiment 2
		BALB/c			SKAP2KO			10'						BALB/c			SKAP2KO			10'
		Uns	Kp 10	Kp 15	Uns	Kp 10	Kp 15	WT - IgG	KO - IgG					Uns	Kp 10	Kp 15	Uns	Kp 10	Kp 15	WT - IgG	KO - IgG
	pSyk	1120	3060	678	594	1500	1290	3780	5160				pVav	172	571	470	93	199	263	656	425
	Total	6890	2810	3190	3090	3990	5070	4060	5690				Total	3930	2500	3380	3130	3150	3300	2650	2370
Normalized to RhoGDI	RhoGDI	2310	2720	2500	2880	3270	3440	3120	3810			Normalized to RhoGDI	RhoGDI	550	533	531	466	526	522	452	590
	phospho/total	0.162554	1.08897	0.212539	0.192233	0.37594	0.254438	0.931034	0.906854				phospho/total	0.0437659	0.2284	0.139053	0.0297125	0.0631746	0.079697	0.247547	0.179325
	Syk/RhoGDI	7.03699e-05	0.000400356	8.50157e-05	6.67476e-05	0.000114966	7.39645e-05	0.000298408	0.000238019				Vav/RhoGDI	7.95744e-05	0.000428518	0.000261871	6.37606e-05	0.000120104	0.000152676	0.000547671	0.00030394
	fold change to uns	1	5.68931	1.20813	1	1.7224	1.10812	4.24057	3.56596				fold change to uns	1	5.38512	3.29089	1	1.88367	2.39452	6.8825	4.7669
	phospho/RhoGDI	0.484848	1.125	0.2712	0.20625	0.458716	0.375	1.21154	1.35433				phospho/RhoGDI	0.312727	1.07129	0.885122	0.199571	0.378327	0.503831	1.45133	0.720339
	total/RhoGDI	2.98268	1.03309	1.276	1.07292	1.22018	1.47384	1.30128	1.49344				total/RhoGDI	7.14545	4.69043	6.36535	6.71674	5.98859	6.32184	5.86283	4.01695
	phospho (fold change to uns)	1	2.32031	0.55935	1	2.22408	1.81818	2.4988	6.56645				pSFK (fold change to uns)	1	3.42565	2.83033	1	1.8957	2.52457	4.64087	3.60944
	total (fold change to uns)	1	0.346362	0.427803	1	1.13726	1.37367	0.436279	1.39194				total (fold change to uns)	1	0.656422	0.890825	1	0.891592	0.941207	0.820498	0.598051
		BALB/c			SKAP2KO			10'						BALB/c			SKAP2KO			10'
		Uns	Kp 10	Kp 15	Uns	Kp 10	Kp 15	WT - IgG	KO - IgG					Uns	Kp 10	Kp 15	Uns	Kp 10	Kp 15	WT - IgG	KO - IgG
	pERK	28.3	4010	2270	390	1690	1010	14400	17100				pAkt	4.59	26.9	85.7	18.8	49.9	80.7	2140	2020
	Total	6530	3240	3680	4120	3240	4410	4530	4880				Total	877	591	775	820	866	1060	1500	1690
Normalized to RhoGDI	RhoGDI	2310	2720	2500	2880	3270	3440	3120	3810			Normalized to RhoGDI	RhoGDI	550	533	531	466	526	522	452	590
	phospho/total	0.00433384	1.23765	0.616848	0.0946602	0.521605	0.229025	3.17881	3.5041				phospho/total	0.00523375	0.0455161	0.110581	0.0229268	0.0576212	0.0761321	1.42667	1.19527
	ERK/RhoGDI	1.87612e-06	0.00045502	0.000246739	3.28681e-05	0.000159512	6.6577e-05	0.00101885	0.000919711				Akt/RhoGDI	9.51591e-06	8.5396e-05	0.00020825	4.91992e-05	0.000109546	0.000145847	0.00315634	0.00202588
	fold change to uns	1	242.532	131.515	1	4.8531	2.02558	543.061	27.9818				fold change to uns	1	8.97402	21.8844	1	2.22658	2.96442	331.691	41.177
	phospho/RhoGDI	0.0122511	1.47426	0.908	0.135417	0.51682	0.293605	4.61538	4.48819				phospho/RhoGDI	0.00834545	0.050469	0.161394	0.0403433	0.0948669	0.154598	4.73451	3.42373
	total/RhoGDI	2.82684	1.19118	1.472	1.43056	0.990826	1.28198	1.45192	1.28084				total/RhoGDI	1.59455	1.10882	1.45951	1.75966	1.64639	2.03065	3.31858	2.86441
	phospho (fold change to uns)	1	120.338	74.1159	1	3.81651	2.16816	376.733	33.1435				phospho (fold change to uns)	1	6.04749	19.3391	1	2.35149	3.83205	567.316	84.8648
	total (fold change to uns)	1	0.421381	0.520723	1	0.692616	0.896139	0.513621	0.895344				total (fold change to uns)	1	0.695382	0.915314	1	0.93563	1.154	2.08121	1.62782
		BALB/c			SKAP2KO			10'						BALB/c			SKAP2KO			10'
		Uns	Kp 10	Kp 15	Uns	Kp 10	Kp 15	WT - IgG	KO - IgG					Uns	Kp 10	Kp 15	Uns	Kp 10	Kp 15	WT - IgG	KO - IgG
	pSFKs	3540	6070	11600	2680	4320	8060	9770	6750				p-p38	1100	4660	3450	2200	2750	2620	16300	20300
	Total SFKs	134	219	376	145	179	390	685	609				Total	14.4	33.8	45.9	15.1	18.3	18.4	140	107
	RhoGDI	3090	2610	2240	2640	3100	3240	2690	3030			Normalized to RhoGDI	RhoGDI	550	533	531	466	526	522	452	590
Normalized to RhoGDI	phospho/total	26.4179	27.7169	30.8511	18.4828	24.1341	20.6667	14.2628	11.0837				phospho/total
	SFKs/RhoGDI	1.14563	2.32567	5.17857	1.01515	1.39355	2.48765	3.63197	2.22772				p38/RhoGDI	2	8.74296	6.49718	4.72103	5.22814	5.01916	36.0619	34.4068
	fold change to uns	1	2.03003	4.52028	1	1.37275	2.45053	3.17028	2.19447				fold change to uns	1	4.37148	3.24859	1	1.10741	1.06315	18.031	7.28798
	phospho/RhoGDI	1.14563	2.32567	5.17857	1.01515	1.39355	2.48765	3.63197	2.22772				phospho/RhoGDI	2	8.74296	6.49718	4.72103	5.22814	5.01916	36.0619	34.4068
	total/RhoGDI	0.0433657	0.083908	0.167857	0.0549242	0.0577419	0.12037	0.254647	0.20099				total/RhoGDI	0.0261818	0.0634146	0.0864407	0.0324034	0.0347909	0.035249	0.309735	0.181356
	phospho (fold change to uns)	1	2.03003	4.52028	1	1.37275	2.45053	3.17028	2.19447				phospho (fold change to uns)	1	4.37148	3.24859	1	1.10741	1.06315	18.031	7.28798
	total (fold change to uns)	1	1.93489	3.87074	1	1.0513	2.19157	5.87208	3.65941				total (fold change to uns)
		BALB/c			SKAP2KO			10'
		Uns	Kp 10	Kp 15	Uns	Kp 10	Kp 15	WT - IgG	KO - IgG
	pPyk2	221	686	1320	271	610	608	1620	1640
	Total	1310	613	890	945	921	890	624	585
Normalized to RhoGDI	RhoGDI	3090	2610	2240	2640	3100	3240	2690	3030
	phospho/total	0.168702	1.11909	1.48315	0.286772	0.662324	0.683146	2.59615	2.80342
	Pyk2/RhoGDI	5.45962e-05	0.000428769	0.000662119	0.000108626	0.000213653	0.000210848	0.000965113	0.000925221
	fold change to uns	1	7.85345	12.1276	1	1.96687	1.94104	17.6773	8.51749
	phospho/RhoGDI	0.071521	0.262835	0.589286	0.102652	0.196774	0.187654	0.60223	0.541254
	total/RhoGDI	0.423948	0.234866	0.397321	0.357955	0.297097	0.274691	0.23197	0.193069
	phospho (fold change to uns)	1	3.67494	8.23933	1	1.91691	1.82807	8.42033	5.27273
	total (fold change to uns)	1	0.553997	0.937193	1	0.829985	0.767392	0.547166	0.539368

## Sheet: Experiment 3
		BALB/c			SKAP2KO			10'						BALB/c			SKAP2KO			10'
		Uns	Kp 10	Kp 15	Uns	Kp 10	Kp 15	WT - IgG	KO - IgG					Uns	Kp 10	Kp 15	Uns	Kp 10	Kp 15	WT - IgG	KO - IgG
	pSyk	289	771	794	384	584	430	2300	2840				pVav	89.4	203	281	154	235	228	515	416
	Total	2800	1810	2300	2440	1830	2290	1910	1720				Total	1660	1470	1970	2350	2120	2400	1880	1710
Normalized to RhoGDI	RhoGDI	3140	3750	3610	3300	3690	4080	3760	5840			Normalized to RhoGDI	RhoGDI	2310	3530	3810	3530	3980	3630	3870	3520
	phospho/total	0.103214	0.425967	0.345217	0.157377	0.319126	0.187773	1.20419	1.65116				phospho/total	0.0538554	0.138095	0.14264	0.0655319	0.110849	0.095	0.273936	0.243275
	Syk/RhoGDI	3.28708e-05	0.000113591	9.56281e-05	4.769e-05	8.64839e-05	4.60228e-05	0.000320263	0.000282733				Syk/RhoGDI	2.3314e-05	3.91205e-05	3.74382e-05	1.85643e-05	2.78515e-05	2.61708e-05	7.07845e-05	6.91122e-05
	fold change to uns	1	3.45569	2.90921	1	1.81346	0.96504	9.74308	5.92857				fold change to uns	1	1.67798	1.60582	1	1.50027	1.40974	3.03613	3.72286
	phospho/RhoGDI	0.0920382	0.2056	0.219945	0.116364	0.158266	0.105392	0.611702	0.486301				phospho/RhoGDI	0.0387013	0.0575071	0.0737533	0.0436261	0.0590452	0.0628099	0.133075	0.118182
	total/RhoGDI	0.89172	0.482667	0.637119	0.739394	0.495935	0.561275	0.507979	0.294521				total/RhoGDI	0.718615	0.416431	0.51706	0.665722	0.532663	0.661157	0.485788	0.485795
	phospho (fold change to uns)	1	2.23385	2.38971	1	1.36009	0.905714	6.64618	4.17915				pSFK (fold change to uns)	1	1.48592	1.90571	1	1.35344	1.43973	3.43851	2.70897
	total (fold change to uns)	1	0.541276	0.714484	1	0.670732	0.759101	0.569662	0.398327				total (fold change to uns)	1	0.579491	0.719524	1	0.800128	0.993142	0.676006	0.729727
		BALB/c			SKAP2KO			10'						BALB/c			SKAP2KO			10'
		Uns	Kp 10	Kp 15	Uns	Kp 10	Kp 15	WT - IgG	KO - IgG					Uns	Kp 10	Kp 15	Uns	Kp 10	Kp 15	WT - IgG	KO - IgG
	pERK	3.25	9400	3060	384	2930	1150	5290	7060				pAkt	30.7	529	561	159	510	470	5090	2680
	Total	4900	3470	4040	4180	3860	4300	3000	2160				Total	509	363	604	702	559	538	1340	1270
Normalized to RhoGDI	RhoGDI	3140	3750	3610	3300	3690	4080	3760	5840			Normalized to RhoGDI	RhoGDI	2310	3530	3810	3530	3980	3630	3870	3520
	phospho/total	0.00663265	2.70893	0.757426	0.091866	0.759067	0.267442	1.76333	3.26852				phospho/total	0.0603143	1.4573	0.928808	0.226496	0.912343	0.873606	3.79851	2.11024
	ERK/RhoGDI	2.11231e-06	0.000722382	0.000209813	2.78382e-05	0.000205709	6.55495e-05	0.000468972	0.000559678				Akt/RhoGDI	2.61101e-05	0.000412833	0.000243782	6.41631e-05	0.000229232	0.000240663	0.000981526	0.000599499
	fold change to uns	1	341.987	99.3288	1	7.38946	2.35466	222.018	20.1047				fold change to uns	1	15.8112	9.33668	1	3.57265	3.7508	37.5918	9.34336
	phospho/RhoGDI	0.00103503	2.50667	0.847645	0.116364	0.794038	0.281863	1.40691	1.2089				phospho/RhoGDI	0.01329	0.149858	0.147244	0.0450425	0.128141	0.129477	1.31525	0.761364
	total/RhoGDI	1.56051	0.925333	1.11911	1.26667	1.04607	1.05392	0.797872	0.369863				total/RhoGDI	0.220346	0.102833	0.15853	0.198867	0.140452	0.148209	0.346253	0.360795
	phospho (fold change to uns)	1	2421.83	818.956	1	6.82376	2.42226	1359.3	10.389				phospho (fold change to uns)	1	11.276	11.0793	1	2.84488	2.87454	98.9647	16.9032
	total (fold change to uns)	1	0.592969	0.717146	1	0.825845	0.832043	0.51129	0.291997				total (fold change to uns)	1	0.466687	0.719459	1	0.706263	0.745269	1.5714	1.81426
		BALB/c			SKAP2KO			10'						BALB/c			SKAP2KO			10'
		Uns	Kp 10	Kp 15	Uns	Kp 10	Kp 15	WT - IgG	KO - IgG					Uns	Kp 10	Kp 15	Uns	Kp 10	Kp 15	WT - IgG	KO - IgG
	pSFKs	3900	11900	13700	5680	9480	8220	12400	12300				p-p38	1810	18300	9600	4730	9830	6430	20400	21300
	Total SFKs												Total	6.88	101	55.6	32	33.4	42.2	168	281
	RhoGDI	3770	4460	4370	3740	3970	4130	4090	4010			Normalized to RhoGDI	RhoGDI	2310	3530	3810	3530	3980	3630	3870	3520
Normalized to RhoGDI	phospho/total	#DIV/0!	#DIV/0!	#DIV/0!	#DIV/0!	#DIV/0!	#DIV/0!	#DIV/0!	#DIV/0!				phospho/total
	SFKs/RhoGDI	1.03448	2.66816	3.13501	1.51872	2.38791	1.99031	3.03178	3.06733				p38/RhoGDI	0.78355	5.18414	2.51969	1.33994	2.46985	1.77135	5.27132	6.05114
	fold change to uns	1	2.57922	3.03051	1	1.57232	1.31052	2.93073	2.01969				fold change to uns	1	6.61622	3.21573	1	1.84325	1.32196	6.72748	4.51596
	phospho/RhoGDI	1.03448	2.66816	3.13501	1.51872	2.38791	1.99031	3.03178	3.06733				phospho/RhoGDI	0.78355	5.18414	2.51969	1.33994	2.46985	1.77135	5.27132	6.05114
	total/RhoGDI	0	0	0	0	0	0	0	0				total/RhoGDI	0.00297835	0.0286119	0.0145932	0.00906516	0.00839196	0.0116253	0.0434109	0.0798295
	phospho (fold change to uns)	1	2.57922	3.03051	1	1.57232	1.31052	2.93073	2.01969				phospho (fold change to uns)	1	6.61622	3.21573	1	1.84325	1.32196	6.72748	4.51596
	total (fold change to uns)	#DIV/0!	#DIV/0!	#DIV/0!	#DIV/0!	#DIV/0!	#DIV/0!	#DIV/0!	#DIV/0!				total (fold change to uns)
		BALB/c			SKAP2KO			10'
		Uns	Kp 10	Kp 15	Uns	Kp 10	Kp 15	WT - IgG	KO - IgG
	pPyk2	331	735	1230	552	654	747	1110	407
	Total	1050	407	859	952	777	1020	680	375
Normalized to RhoGDI	RhoGDI	3770	4460	4370	3740	3970	4130	4090	4010
	phospho/total	0.315238	1.8059	1.4319	0.579832	0.841699	0.732353	1.63235	1.08533
	Akt/RhoGDI	8.36175e-05	0.00040491	0.000327665	0.000155035	0.000212015	0.000177325	0.000399108	0.000270657
	fold change to uns	1	4.8424	3.91862	1	1.36753	1.14377	4.77302	1.74577
	phospho/RhoGDI	0.0877984	0.164798	0.281465	0.147594	0.164736	0.180872	0.271394	0.101496
	total/RhoGDI	0.278515	0.0912556	0.196568	0.254545	0.195718	0.246973	0.166259	0.0935162
	phospho (fold change to uns)	1	1.87701	3.2058	1	1.11614	1.22547	3.0911	0.687674
	total (fold change to uns)	1	0.327651	0.705771	1	0.768892	0.970253	0.59695	0.367385

## Sheet: phospho to total to RhoGDI
	Table 1
		Normalized phospho-SFK intensitya
		WT			KO			WT	KO
		Uns	Kp 10'	Kp 15'	Uns	Kp 10'	Kp 15'	IC 10'	IC 10'
	Experiment 1	3.272	4.8547	8.63946	2.79675	3.8664	4.20588	8.16176	6.17986
	Experiment 2	1.14563	2.32567	5.17857	1.01515	1.39355	2.48765	3.63197	2.22772
	Experiment 3	1.03448	2.66816	3.13501	1.51872	2.38791	1.99031	3.03178	3.06733
		Fold change phospho-SFKs to uns within each groupb
		WT			KO			WT	KO
		Unsc	Kp 10'	Kp 15'	Uns	Kp 10'	Kp 15'	IC 10'	IC 10'
	Experiment 1	1.00 (1.80)	1.48371	2.64042	1.00 (1.57)	1.38246	1.50385	2.49443	2.20966
	Experiment 2	1.00 (0.63)	2.03003	4.52028	1.00 (0.57)	1.37275	2.45053	3.17028	2.19447
	Experiment 3	1.00 (0.57)	2.57922	3.03051	1.00 (0.85)	1.57232	1.31052	2.93073	2.01969
		Fold change phospho-SFKs to WT Unsd
		WT			KO			WT	KO
		Uns	Kp 10'	Kp 15'	Uns	Kp 10'	Kp 15'	IC 10'	IC 10'
	Experiment 1	1	1.48371	2.64042	0.854752	1.18166	1.28542	2.49443	1.88871
	Experiment 2	1	2.03003	4.52028	0.886107	1.2164	2.17143	3.17028	1.94454
	Experiment 3	1	2.57922	3.03051	1.46809	2.30831	1.92397	2.93073	2.96509
	WT and SKAP-2-/- (KO) DIV neutrophils were infected with wild-type Kp, or stimulated with IgG IC (as positive control) for 10 minutes at 37ºC. Lysates were prepared and analyzed by western blot for phospho-SFKs, and RhoGDI (loading control). Quantification of protein level was assessed using Licor. a Normalized phospho-SFKs = ratio of the intensity of phosphorylated bands to RhoGDI loading contro…
		Normalized phospho-Syk intensityb
		WT			KO			WT	KO
		Uns	Kp 10'	Kp 15'	Uns	Kp 10'	Kp 15'	IC 10'	IC 10'
	Experiment 1	5.46561	16.0907	9.97208	4.51411	9.36281	6.68683	30.242	28.8516
	Experiment 2	7.03699	40.0356	8.50157	6.67476	11.4966	7.39645	29.8408	23.8019
	Experiment 3	3.28708	11.3591	9.56281	4.769	8.64839	4.60228	32.0263	28.2733
		Fold change of phospho-Syk to uns within each groupb
		WT			KO			WT	KO
		Unsc	Kp 10'	Kp 15'	Uns	Kp 10'	Kp 15'	IC 10'	IC 10'
	Experiment 1	1.00 (1.25)	2.944	1.82451	1.00 (1.06)	2.07412	1.48132	5.53315	6.39142
	Experiment 2	1.00 (1.47)	5.68931	1.20813	1.00 (1.60)	1.7224	1.10812	4.24057	3.56596
	Experiment 3	1.00 (0.30)	3.45569	2.90921	1.00 (1.63)	1.81346	0.96504	9.74308	5.92857
		Fold change of phospho-Syk to WT Unsd
		WT			KO			WT	KO
		Uns	Kp 10'	Kp 15'	Uns	Kp 10'	Kp 15'	IC 10'	IC 10'
	Experiment 1	1	2.944	1.82451	0.82591	1.71304	1.22344	5.53315	5.27874
	Experiment 2	1	5.68931	1.20813	0.948525	1.63374	1.05108	4.24057	3.38241
	Experiment 3	1	3.45569	2.90921	1.45083	2.63103	1.40011	9.74308	8.60136
	WT and SKAP-2-/- (KO) DIV neutrophils were infected with wild-type Kp, or stimulated with IgG IC (as positive control) for 10 minutes at 37ºC. Lysates were prepared and analyzed by western blot for phospho-Syk Y352 and RhoGDI (loading control). Blots were then stripped and re-probed for the respective total protein. Quantification of protein level was assessed using Licor. a Normalized phospho-Sy…
		Normalized phospho-Pyk2 intensitya
		WT			KO			WT	KO
		Uns	Kp 10'	Kp 15'	Uns	Kp 10'	Kp 15'	IC 10'	IC 10'
	Experiment 1	26.3161	122.045	101.239	33.0996	57.1972	38.046	198.057	239.757
	Experiment 2	5.45962	42.8769	66.2119	10.8626	21.3653	21.0848	96.5113	92.5221
	Experiment 3	8.36175	40.491	32.7665	15.5035	21.2015	17.7325	39.9108	27.0657
		Fold change of phospho-Pyk2 to uns within each groupb
		WT			KO			WT	KO
		Unsc	Kp 10'	Kp 15'	Uns	Kp 10'	Kp 15'	IC 10'	IC 10'
	Experiment 1	1.00 (2.34)	4.63767	3.84703	1.00 (1.45)	1.72803	1.14944	7.52609	7.24351
	Experiment 2	1.00 (0.30)	7.85345	12.1276	1.00 (0.48)	1.96687	1.94104	17.6773	8.51749
	Experiment 3	1.00 (0.37)	4.8424	3.91862	1.00 (0.68)	1.36753	1.14377	4.77302	1.74577
		Fold change of phospho-Pyk2 to WT Unsd
		WT			KO			WT	KO
		Uns	Kp 10'	Kp 15'	Uns	Kp 10'	Kp 15'	IC 10'	IC 10'
	Experiment 1	1	4.63767	3.84703	1.25777	2.17347	1.44573	7.52609	9.11068
	Experiment 2	1	7.85345	12.1276	1.98962	3.91333	3.86194	17.6773	16.9466
	Experiment 3	1	4.8424	3.91862	1.8541	2.53553	2.12067	4.77302	3.23684
	WT and SKAP-2-/- (KO) DIV neutrophils were infected with wild-type Kp, or stimulated with IgG IC (as positive control) for 10 minutes at 37ºC. Lysates were prepared and analyzed by western blot for phospho-Pyk2 and RhoGDI (loading control). Blots were then stripped and re-probed for the respective total protein. Quantification of protein level was assessed using Licor. a Normalized phospho-Pyk2 =…
